# Supplementary material
Source: PubMed Central journal article supplement (PMC1062879)

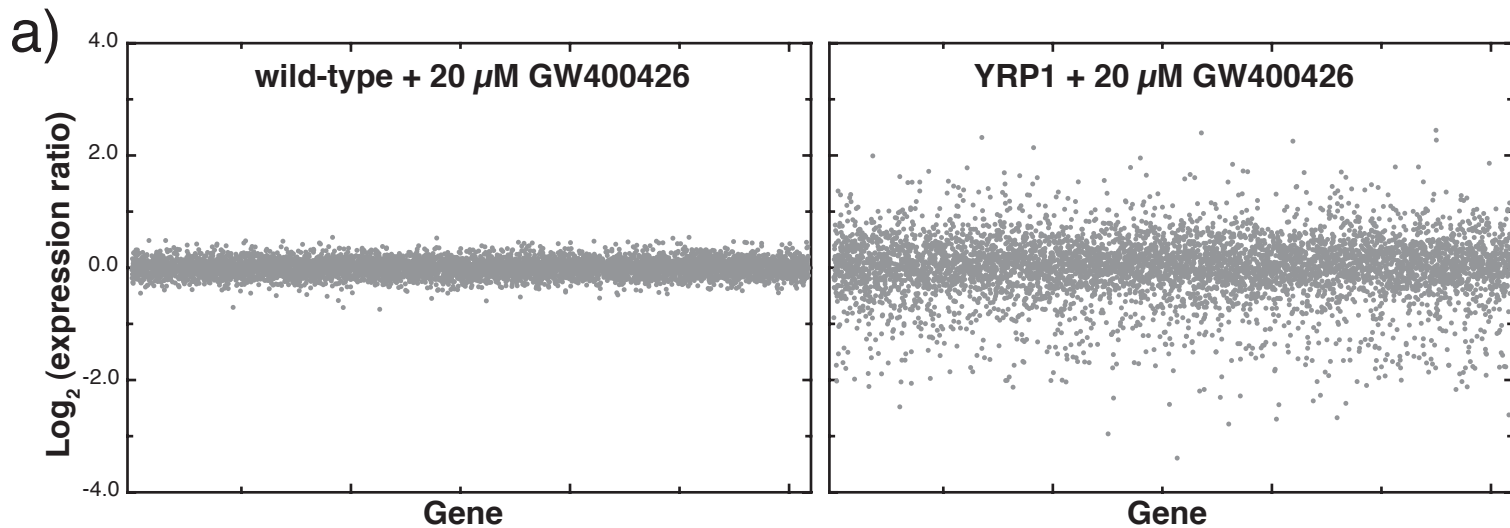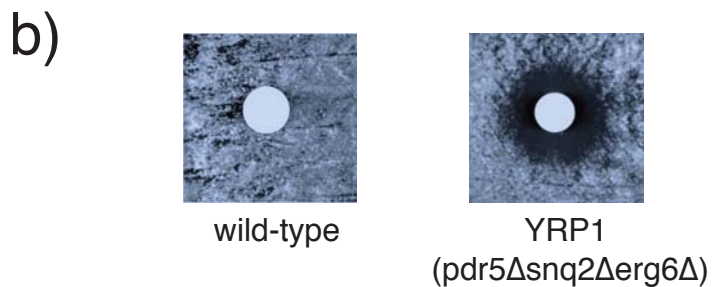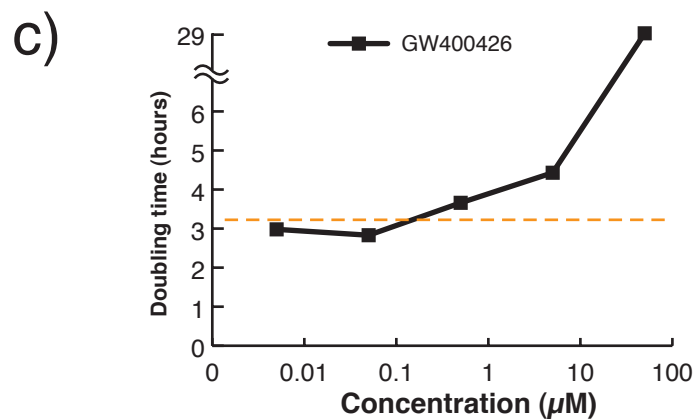

Supplement: pnas_102_10_3587__1.pdf [file pnas_102_10_3587__1.pdf]

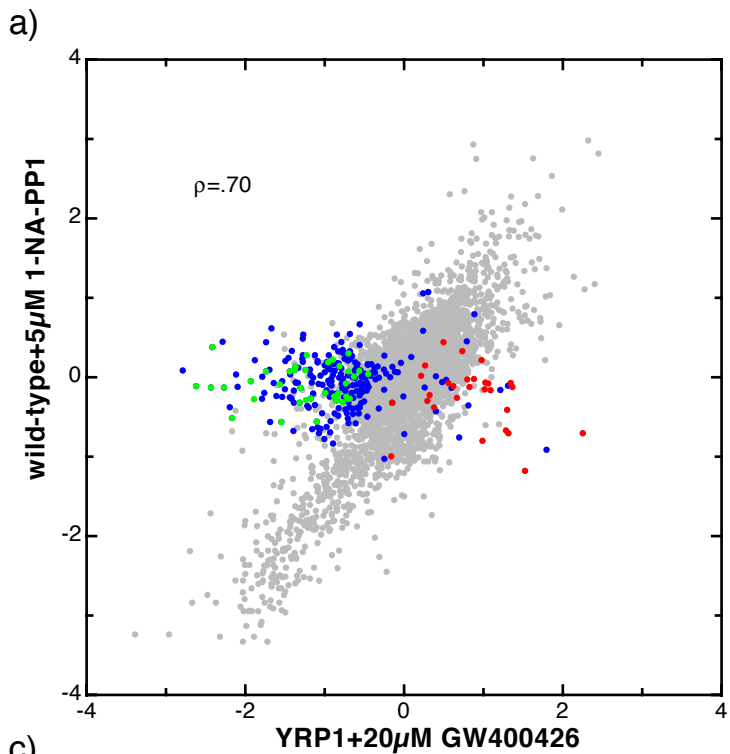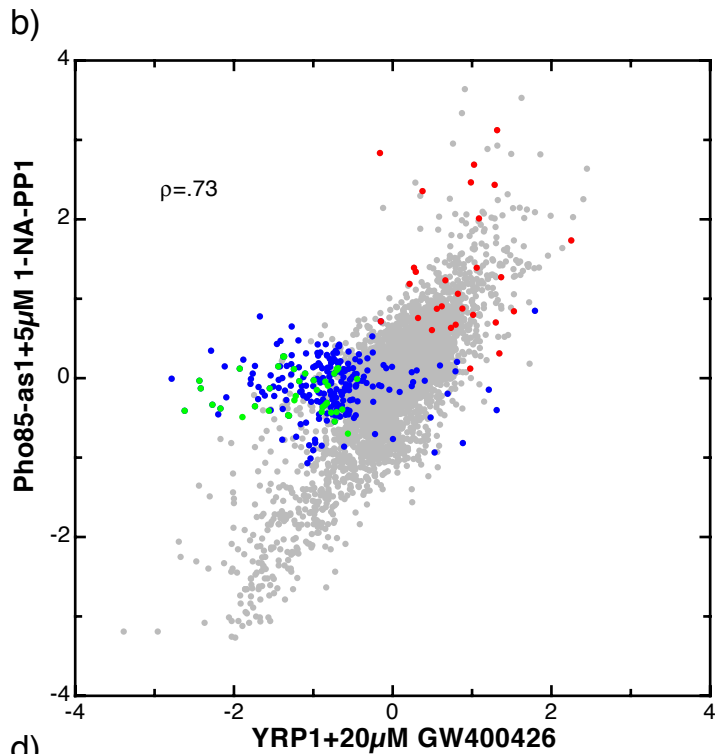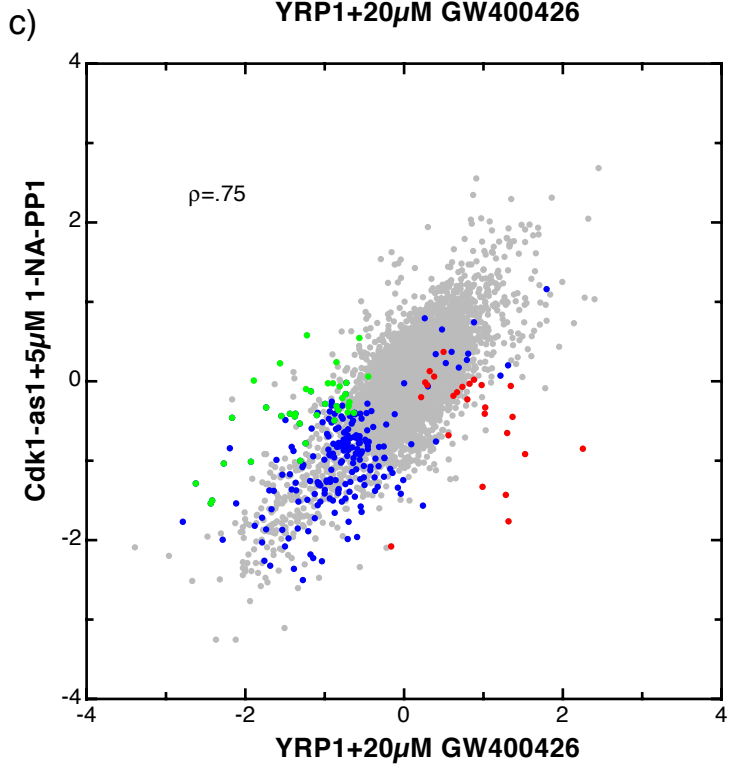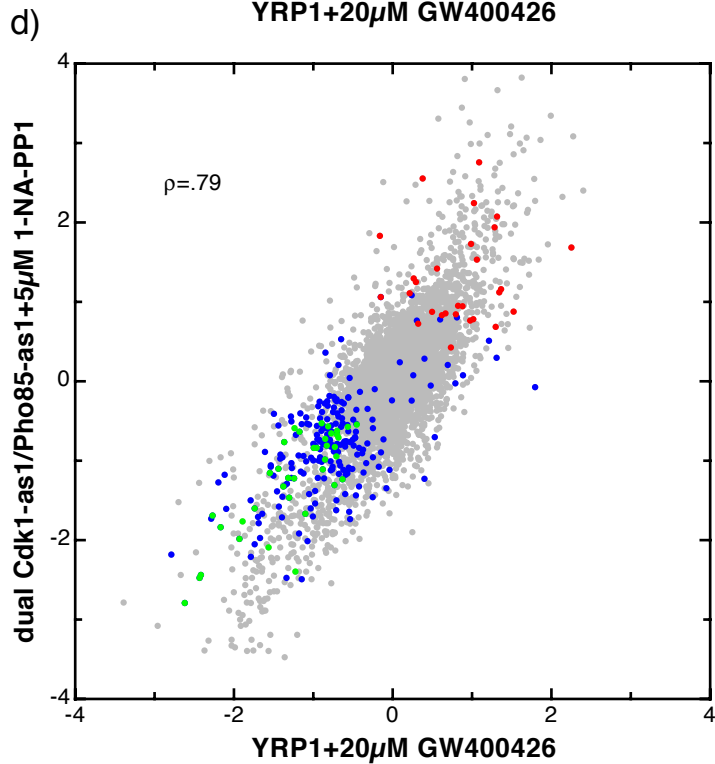

Supplement: pnas_102_10_3587__2.pdf [file pnas_102_10_3587__2.pdf]
